# Supplementary material
Source: Springer Nature journal article supplement (https://www.springermedizin.de/resource/supplementary/12889_2009_2062_MOESM2_ESM.pdf/9484474)

| CHC                      | Odds ratio | 95% CI       |
|--------------------------|------------|--------------|
| HP: At least one subject | 1.12       | (0.84, 1.50) |
| Healthy foods            | 1.30       | (0.93, 1.82) |
| Home safety              | 1.09       | (0.59, 2.02) |
| Family conflicts         | 2.29       | (1.43, 3.66) |
| Exercise                 | 0.96       | (0.71, 1.30) |
| Smoking                  | 0.96       | (0.65, 1.44) |
| Alcohol                  | 0.69       | (0.46, 1.05) |
| Falls prevention         | 0.67       | (0.13, 3.56) |

| FFS                      | Odds ratio | 95% CI       |
|--------------------------|------------|--------------|
| HP: At least one subject | 0.76       | (0.59, 0.98) |
| Healthy foods            | 0.88       | (0.63, 1.22) |
| Home safety              | 1.11       | (0.54, 2.28) |
| Family conflicts         | 1.01       | (0.64, 1.59) |
| Exercise                 | 0.60       | (0.46, 0.78) |
| Smoking                  | 0.69       | (0.49, 0.99) |
| Alcohol                  | 0.56       | (0.36, 0.88) |
| Falls prevention         | 1.27       | (0.67, 2.40) |

| FHN                      | Odds ratio | 95% CI       |
|--------------------------|------------|--------------|
| HP: At least one subject | 0.72       | (0.56, 0.92) |
| Healthy foods            | 0.79       | (0.59, 1.06) |
| Home safety              | 0.71       | (0.32, 1.55) |
| Family conflicts         | 1.95       | (1.21, 3.14) |
| Exercise                 | 0.60       | (0.46, 0.78) |
| Smoking                  | 0.71       | (0.51, 0.97) |
| Alcohol                  | 0.50       | (0.35, 0.72) |
| Falls prevention         | 2.39       | (0.66, 8.61) |

| HSO                      | Odds ratio | 95% CI       |
|--------------------------|------------|--------------|
| HP: At least one subject | 0.62       | (0.48, 0.80) |
| Healthy foods            | 0.91       | (0.66, 1.25) |
| Home safety              | 1.74       | (0.77, 3.92) |
| Family conflicts         | 0.89       | (0.58, 1.37) |
| Exercise                 | 0.54       | (0.41, 0.71) |
| Smoking                  | 0.81       | (0.56, 1.16) |
| Alcohol                  | 0.44       | (0.29, 0.68) |
| Falls prevention         | 1.83       | (0.42, 8.03) |

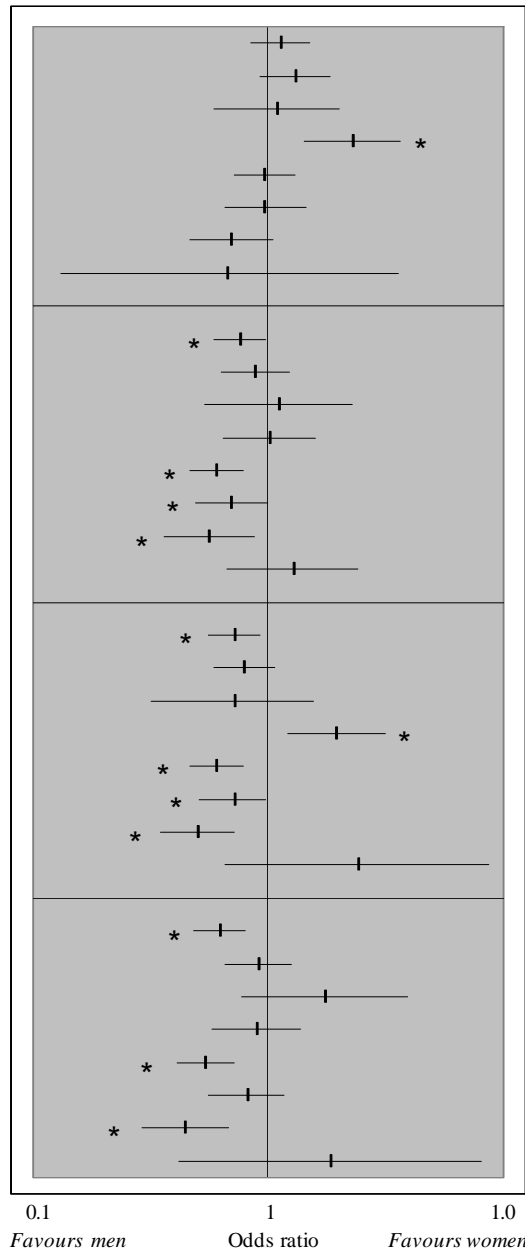

Supplement: MOESM2 [file 9484474]
